# Supplementary material for: Antigen Specificity and Cell Engineering Determine CAR T Cell Efficacy in Group 3 Medulloblastoma
Source: Research Square preprint supplement (doi:10.21203/rs.3.rs-8863171/v1), 2026-02-19
Supplement: Supplementary file 1 [file 9be6199f700db41776ac34d9.xlsx]

## Sheet: Figure 1
	Test for normality			Test for equal variance			Test to compare mean/median
Fig. 1A	Shapiro-Wilk (P value)				Bartlett's test		Dunn's multiple comparisons test	Mean rank diff.	Significant?	Summary	Adjusted P Value
	EphA2 expression	<0.0001	fail	<0.0001		fail	WNT vs. SHH	186.1	Yes	****	<0.0001
							WNT vs. G3	5.653	No	ns	>0.9999
							WNT vs. G4	182.5	Yes	****	<0.0001
							WNT vs. Normal	221	Yes	**	0.003
							SHH vs. G3	-180.5	Yes	****	<0.0001
							SHH vs. G4	-3.663	No	ns	>0.9999
							SHH vs. Normal	34.85	No	ns	>0.9999
							G3 vs. G4	176.8	Yes	****	<0.0001
							G3 vs. Normal	215.3	Yes	**	0.003
							G4 vs. Normal	38.51	No	ns	>0.9999
Fig. 1B	Shapiro-Wilk (P value)				Bartlett's test		Dunn's multiple comparisons test	Mean rank diff.	Significant?	Summary	Adjusted P Value
	B7-H3 expression	<0.0001	fail	0.1334		pass	WNT vs. SHH	119	Yes	****	<0.0001
							WNT vs. G3	100.2	Yes	****	<0.0001
							WNT vs. G4	66.44	Yes	*	0.0117
							WNT vs. Normal	283.4	Yes	****	<0.0001
							SHH vs. G3	-18.8	No	ns	>0.9999
							SHH vs. G4	-52.6	Yes	**	0.0041
							SHH vs. Normal	164.3	No	ns	0.0577
							G3 vs. G4	-33.8	No	ns	0.235
							G3 vs. Normal	183.1	Yes	*	0.021
							G4 vs. Normal	216.9	Yes	**	0.0024
Fig. 1C	Shapiro-Wilk (P value)				Bartlett's test		Dunn's multiple comparisons test	Mean rank diff.	Significant?	Summary	Adjusted P Value
	EphA2 driver activity	<0.0001	fail	<0.0001		fail	WNT vs. SHH	202.2	Yes	****	<0.0001
							WNT vs. G3	5.81	No	ns	>0.9999
							WNT vs. G4	206.3	Yes	****	<0.0001
							WNT vs. Normal	224.9	Yes	**	0.0024
							SHH vs. G3	-196.4	Yes	****	<0.0001
							SHH vs. G4	4.145	No	ns	>0.9999
							SHH vs. Normal	22.73	No	ns	>0.9999
							G3 vs. G4	200.5	Yes	****	<0.0001
							G3 vs. Normal	219.1	Yes	**	0.0023
							G4 vs. Normal	18.58	No	ns	>0.9999
Fig. 1D	Shapiro-Wilk (P value)				Bartlett's test		Tukey's multiple comparisons test	Mean diff.	95.00% CI of diff.	Below threshold?	Summary	Adjusted P Value
	B7-H3 driver activity	0.8477	pass	0.0527		pass	WNT vs. SHH	0.05872	0.02993 to 0.08751	Yes	****	<0.0001
							WNT vs. G3	0.06051	0.03168 to 0.08934	Yes	****	<0.0001
							WNT vs. G4	0.03204	0.004787 to 0.05929	Yes	*	0.012
							WNT vs. Normal	0.1469	0.06546 to 0.2284	Yes	****	<0.0001
							SHH vs. G3	0.001792	-0.02014 to 0.02373	No	ns	0.9994
							SHH vs. G4	-0.02668	-0.04649 to -0.006871	Yes	**	0.0024
							SHH vs. Normal	0.08819	0.008925 to 0.1675	Yes	*	0.0206
							G3 vs. G4	-0.02847	-0.04834 to -0.008603	Yes	***	0.001
							G3 vs. Normal	0.0864	0.007118 to 0.1657	Yes	*	0.0248
							G4 vs. Normal	0.1149	0.03615 to 0.1936	Yes	***	0.0007
Fig. 1E	Shapiro-Wilk (P value)				Bartlett's test		Tukey's multiple comparisons test	Mean diff.	95.00% CI of diff.	Below threshold?	Summary	Adjusted P Value
	EphA2 expression	0.6933	pass	0.7505		pass	D341 vs. HDMB03	-2789	-5393 to -184.8	Yes	*	0.0367
							D341 vs. D425	5072	2467 to 7676	Yes	**	0.0011
							HDMB03 vs. D425	7861	5256 to 10465	Yes	****	<0.0001
Fig. 1F	Shapiro-Wilk (P value)				Bartlett's test		Dunn's multiple comparisons test	Mean rank diff.	Significant?	Summary	Adjusted P Value
	B7-H3 expression	0.0241	fail	0.0224		fail	D341 vs. HDMB03	-4	No	ns	0.35
							D341 vs. D425	-8	Yes	**	0.0051
							HDMB03 vs. D425	-4	No	ns	0.35

## Sheet: Figure 2
	Test for normality			Test for equal variance			Test to compare mean/median
Fig. 2B	Shapiro-Wilk (P value)			Bartlett's test (P value)			Tukey's multiple comparisons test	Mean diff.	95.00% CI of diff.	Below threshold?	Summary	Adjusted P Value
	NT	0.1508	pass	<0.0001		fail	NT vs. EphA2	-83.59	-89.03 to -78.15	Yes	****	<0.0001
	EphA2	0.6485	pass				NT vs. B7-H3	-90.66	-94.73 to -86.58	Yes	****	<0.0001
	B7-H3	0.9746	pass				EphA2 vs. B7-H3	-7.067	-11.25 to -2.880	Yes	**	0.0063
Fig. 2E	Shapiro-Wilk (P value)			Bartlett's test (P value)			Multiple paired T-tests (EphA2 vs. B7-H3)	Discovery?	P value	Mean of EphA2	Mean of B7-H3	Difference	SE of difference	t ratio	df	q value
	CD4+	0.0794	pass	NA		NA	CD4+	Yes	0.002372	60.08	53.25	6.833	1.205	5.671	5	0.004127
	CD8+	0.1738	pass				CD8+	Yes	0.003931	33.53	38.53	-5	0.9899	5.051	5	0.004127
							FDR (Q) = 5%
Fig. 2F	Shapiro-Wilk (P value)			Bartlett's test (P value)			Multiple paired T-tests (EphA2 vs. B7-H3)	Discovery?	P value	Mean of EphA2	Mean of B7-H3	Difference	SE of difference	t ratio	df	q value
CD4 (left)	Effector	0.5632	pass	NA		NA	Effector	Yes	0.000783	41.3	31.85	9.45	1.305	7.242	5	0.000823
	TEMRA	0.9405	pass				TEMRA	Yes	0.003977	21.07	10.85	10.22	2.029	5.037	5	0.001392
	Naive	0.9158	pass				Naive	No	0.219698	11.43	12.5	-1.068	0.7617	1.403	5	0.057671
	Central	0.451	pass				Central	Yes	0.001909	23.78	42.1	-18.32	3.076	5.955	5	0.001002
							FDR (Q) = 5%
							Multiple Wilcoxin tests (EphA2 vs. B7-H3)	Discovery?	P value	Sum of pos. ranks	Sum of neg. ranks	Sum of signed ranks (W)	q value
CD8 (right)	Effector	0.0223	fail	NA		NA	Effector	No	0.0625	1	-20	-19	0.0875
	TEMRA	0.9608	pass				TEMRA	No	0.03125	21	0	21	0.065625
	Naive	0.4044	pass				Naive	No	0.09375	19	-2	17	0.098438
	Central	0.1651	pass				Central	No	0.03125	0	-21	-21	0.065625
							FDR (Q) = 5%
Fig. 2G	Shapiro-Wilk (P value)			Bartlett's test (P value)			Paired T test (EphA2 vs B7-H3)	P value	Below Threshold?
	D341 (left)	0.5359	pass	NA		NA	D341	0.0019	Yes
	HDMB03 (middle)	0.4953	pass				HDMB03	0.0329	Yes
	D425 (right)	0.4463	pass				D425	0.0826	No
Fig. 2K	Shapiro-Wilk (P value)			Bartlett's test (P value)			Wilcoxon mathed-pairs sign rank test (EphA2 vs B7-H3)	P value
	D341 (left)	Not applicable for discrete, count data		NA		NA	D341	0.125	No
	HDMB03 (middle)						HDMB03	0.0625	No
	D425 (right)						D425	0.0625	No
Fig. 2L	Shapiro-Wilk (P value)			Bartlett's test (P value)			Paired T test (EphA2 vs B7-H3)	P value
	D341 (left)	0.1417	pass	NA		NA	D341	0.0038	Yes
	HDMB03 (middle)	0.2144	pass				HDMB03	0.0086	Yes
	D425 (right)	0.1992	pass				D425	0.0065	Yes
Fig. 2M	Shapiro-Wilk (P value)			Bartlett's test (P value)			Wilcoxon mathed-pairs sign rank test (EphA2 vs B7-H3)	P value
	D341 (left)	0.0377	fail	NA		NA	D341	0.125	No
	HDMB03 (middle)	0.1287	pass				D425	0.0312	Yes
	D425 (right)	0.0189	fail				Paired T test (EphA2 vs B7-H3)	P value
							HDMB03	0.0011	Yes
Fig. 2N	Shapiro-Wilk (P value)			Bartlett's test (P value)			Wilcoxon mathed-pairs sign rank test (EphA2 vs B7-H3)	P value
	D341 (left)	0.0422	fail	NA		NA	D341	0.0625	No
	HDMB03 (middle)	0.379	pass				Paired T test (EphA2 vs B7-H3)	P value
	D425 (right)	0.4135	pass				HDMB03	0.0184	Yes
							D425	0.0096	Yes

## Sheet: Figure 3
	Test for normality			Test for equal variance			Test to compare mean/median
Fig. 3A	Shapiro-Wilk (P value)			Bartlett's test (P value)			Tukey's multiple comparisons test	Mean diff.	95.00% CI of diff.	Below threshold?	Summary	Adjusted P Value
	D341 (left)	0.1319	pass	0.6837		pass	EphA2 base vs. EphA2 stim1	5.625	-9.913 to 21.16	No	ns	0.4356
							B7-H3 base vs. B7-H3 stim 1	31.72	23.92 to 39.52	Yes	***	0.001
							EphA2 stim1 vs. B7-H3 stim 1	34.05	21.79 to 46.30	Yes	**	0.0028
	HDMB03(middle)	0.2847	pass	0.5938		pass	Tukey's multiple comparisons test	Mean diff.	95.00% CI of diff.	Below threshold?	Summary	Adjusted P Value
							EphA2 base vs. EphA2 stim1	2.75	-8.625 to 14.13	No	ns	0.8725
							B7-H3 base vs. B7-H3 stim 1	19.5	8.125 to 30.88	Yes	**	0.0021
							EphA2 stim1 vs. B7-H3 stim 1	24.7	13.32 to 36.08	Yes	***	0.0004
	D425 (right)	0.3733	pass	0.8335		pass	Tukey's multiple comparisons test	Mean diff.	95.00% CI of diff.	Below threshold?	Summary	Adjusted P Value
							EphA2 base vs. EphA2 stim1	5	-3.432 to 13.43	No	ns	0.3122
							B7-H3 base vs. B7-H3 stim 1	22	13.57 to 30.43	Yes	****	<0.0001
							EphA2 stim1 vs. B7-H3 stim 1	24.95	16.52 to 33.38	Yes	****	<0.0001
Fig. 3B (CD4+)	Shapiro-Wilk (P value)			Bartlett's test (P value)			Multiple paired T tests (EphA2 vs. B7-H3)	Discovery?	P value	Mean of EphA2	Mean of B7-H3	Difference	SE of difference	t ratio	df	q value
D341 (left)	Effector	0.3097	pass	NA		NA	Effector	Yes	0.010228	61.28	43.58	17.7	3.055	5.794	3	0.005546
	TEMRA	0.2368	pass				TEMRA	Yes	0.015846	15.83	34.68	-18.85	3.809	4.947	3	0.005546
	Naive	0.2408	pass				Naive	Yes	0.012272	3.838	8.843	-5.005	0.9221	5.428	3	0.005546
	Central	0.1568	pass				Central	No	0.200616	19.07	12.93	6.14	3.756	1.635	3	0.052662
							FDR (Q) = 5%
	Shapiro-Wilk (P value)			Bartlett's test (P value)			Multiple Wilcoxin tests (EphA2 vs. B7-H3)	Discovery?	P value	Sum of pos. ranks	Sum of neg. ranks	Sum of signed ranks (W)	q value
HDMB03 (middle)	Effector	0.01	fail	NA		NA	Effector	No	0.125	10	0	10	0.13125
	TEMRA	0.7241	pass				TEMRA	No	0.125	0	-10	-10	0.13125
	Naive	0.1297	pass				Naive	No	0.125	10	0	10	0.13125
	Central	0.8015	pass				Central	No	0.125	10	0	10	0.13125
							FDR (Q) = 5%
	Shapiro-Wilk (P value)			Bartlett's test (P value)			Multiple paired t tests (EphA2 vs B7-H3)	Discovery?	P value	Mean of EphA2	Mean of B7-H3	Difference	SE of difference	t ratio	df	q value
D425 (right)	Effector	0.4403	pass	NA		NA	Effector	Yes	0.007354	49.15	32.1	17.05	2.618	6.512	3	0.007722
	TEMRA	0.8765	pass				TEMRA	Yes	0.000873	28.95	55.7	-26.75	1.977	13.53	3	0.001834
	Naive	0.3673	pass				Naive	No	0.295887	6.203	4.735	1.468	1.162	1.263	3	0.155341
	Central	0.393	pass				Central	Yes	0.037061	15.7	7.46	8.238	2.295	3.589	3	0.025943
							FDR (Q) = 5%
Fig. 3C (CD8+)	Shapiro-Wilk (P value)			Bartlett's test (P value)			Multiple Wilcoxin tests (EphA2 vs. B7-H3)	Discovery?	P value	Sum of pos. ranks	Sum of neg. ranks	Sum of signed ranks (W)	q value
D341 (left)	Effector	0.0492	fail	NA		NA	Effector	No	0.125	10	0	10	0.175
	TEMRA	0.2611	pass				TEMRA	No	0.125	0	-10	-10	0.175
	Naive	0.8429	pass				Naive	No	0.625	3	-7	-4	0.65625
	Central	0.051	pass				Central	No	0.125	10	0	10	0.175
							FDR (Q) = 5%
	Shapiro-Wilk (P value)			Bartlett's test (P value)			Multiple paired t tests (EphA2 vs B7-H3)	Discovery?	P value	Mean of EphA2	Mean of B7-H3	Difference	SE of difference	t ratio	df	q value
HDMB03 (middle)	Effector	0.3539	pass	NA		NA	Effector	Yes	0.002098	26	8.243	17.76	1.767	10.05	3	0.004406
	TEMRA	0.3711	pass				TEMRA	Yes	0.000535	61.4	88.2	-26.8	1.68	15.95	3	0.002249
	Naive	0.5074	pass				Naive	Yes	0.012792	7.403	2.415	4.988	0.9327	5.347	3	0.013432
	Central	0.4374	pass				Central	Yes	0.006411	5.203	1.14	4.063	0.5944	6.834	3	0.008975
							FDR (Q) = 5%
	Shapiro-Wilk (P value)			Bartlett's test (P value)			Multiple Wilcoxin tests (EphA2 vs. B7-H3)	Discovery?	P value	Sum of pos. ranks	Sum of neg. ranks	Sum of signed ranks (W)	q value
D425 (right)	Effector	0.2136	pass	NA		NA	Effector	No	0.125	10	0	10	0.13125
	TEMRA	0.2486	pass				TEMRA	No	0.125	0	-10	-10	0.13125
	Naive	0.6072	pass				Naive	No	0.125	10	0	10	0.13125
	Central	0.0188	fail				Central	No	0.125	10	0	10	0.13125
							FDR (Q) = 5%
Fig. 3D	Shapiro-Wilk (P value)			Bartlett's test (P value)			Multiple Wilcoxin tests (EphA2 vs. B7-H3)	Discovery?	P value	Sum of pos. ranks	Sum of neg. ranks	Sum of signed ranks (W)	q value
D341 (left)	Effector	0.2014	pass	NA		NA	CD4 Effector	No	0.125	10	0	10	0.175
	TEMRA	0.3122	pass				CD4 TEMRA	No	0.125	10	0	10	0.175
	Naive	0.1082	pass				CD4 Naive	No	0.25	9	-1	8	0.3
	Central	0.0209	fail				CD4 Central	No	0.125	10	0	10	0.175
							CD8 Effector	No	0.125	10	0	10	0.175
							CD8 TEMRA	No	0.125	0	-10	-10	0.175
							CD8 Naive	No	0.375	2	-8	-6	0.39375
							CD8 Central	No	0.125	10	0	10	0.175
							FDR (Q) = 5%
	Shapiro-Wilk (P value)			Bartlett's test (P value)			Multiple Wilcoxin tests (EphA2 vs. B7-H3)	Discovery?	P value	Sum of pos. ranks	Sum of neg. ranks	Sum of signed ranks (W)	q value
HDMB03 (middle)	Effector	0.0325	fail	NA		NA	CD4 Effector	No	0.125	10	0	10	0.15
	TEMRA	0.0133	fail				CD4 TEMRA	No	0.25	1	-9	-8	0.2625
	Naive	0.0152	fail				CD4 Naive	No	0.125	10	0	10	0.15
	Central	0.0016	fail				CD4 Central	No	0.125	10	0	10	0.15
							CD8 Effector	No	0.125	10	0	10	0.15
							CD8 TEMRA	No	0.125	0	-10	-10	0.15
							CD8 Naive	No	0.125	10	0	10	0.15
							CD8 Central	No	0.125	10	0	10	0.15
							FDR (Q) = 5%
	Shapiro-Wilk (P value)			Bartlett's test (P value)			Multiple Wilcoxin tests (EphA2 vs. B7-H3)	Discovery?	P value	Sum of pos. ranks	Sum of neg. ranks	Sum of signed ranks (W)	q value
D425 (right)	Effector	0.0584	pass	NA		NA	CD4 Effector	No	0.125	10	0	10	0.175
	TEMRA	0.0311	fail				CD4 TEMRA	No	>0.999999	5	-5	0	>0.999999
	Naive	0.0777	pass				CD4 Naive	No	0.125	10	0	10	0.175
	Central	0.004	fail				CD4 Central	No	0.125	10	0	10	0.175
							CD8 Effector	No	0.125	10	0	10	0.175
							CD8 TEMRA	No	0.125	0	-10	-10	0.175
							CD8 Naive	No	0.875	6	-4	2	>0.999999
							CD8 Central	No	0.125	10	0	10	0.175
							FDR (Q) = 5%
Fig. 3E	Shapiro-Wilk (P value)			Bartlett's test (P value)			Multiple paired t tests (EphA2 vs B7-H3)	Discovery?	P value	Mean of B7-H3	Mean of EphA2	Difference	SE of difference	t ratio	df	q value
CD4	PD-1	0.63	pass	NA		NA	CD4 PD1	No	0.145973	55.3	67.5	-12.2	6.25	1.952	3	0.306544
	LAG3	0.8056	pass				CD4 LAG3	No	0.462062	20.03	23.43	-3.4	4.042	0.8411	3	0.493374
	TIM3	0.083	pass				CD4 TIM3	No	0.117076	91.58	94.83	-3.25	1.489	2.182	3	0.306544
	TIGIT	0.2826	pass				CD4 TIGIT	No	0.46988	4.225	5.318	-1.093	1.324	0.8249	3	0.493374
							FDR (Q) = 5%
	Shapiro-Wilk (P value)			Bartlett's test (P value)			Multiple paired t tests (EphA2 vs B7-H3)	Discovery?	P value	Mean of B7-H3	Mean of EphA2	Difference	SE of difference	t ratio	df	q value
CD8	PD-1	0.9377	pass	NA		NA	CD8 PD1	Yes	0.004381	13	25.45	-12.45	1.596	7.803	3	0.0046
	LAG3	0.8971	pass				CD8 LAG3	Yes	0.019978	62.2	80.33	-18.13	3.99	4.543	3	0.010489
	TIM3	0.6825	pass				CD8 TIM3	Yes	0.030915	96.35	98.08	-1.725	0.4479	3.851	3	0.01082
	TIGIT	0.4552	pass				CD8 TIGIT	No	0.873417	14.45	14.2	0.255	1.471	0.1733	3	0.229272
							FDR (Q) = 5%
Fig. 3F	Shapiro-Wilk (P value)			Bartlett's test (P value)			Multiple paired t tests (EphA2 vs B7-H3)	Discovery?	P value	Mean of B7-H3	Mean of EphA2	Difference	SE of difference	t ratio	df	q value
CD4	PD-1	0.792	pass	NA		NA	CD4 PD1	No	0.129026	59.2	79.23	-20.03	9.628	2.08	3	0.135477
	LAG3	0.2104	pass				CD4 LAG3	No	0.036005	37.23	16.12	21.11	5.815	3.63	3	0.056708
	TIM3	0.6465	pass				CD4 TIM3	Yes	0.00217	17.9	53.9	-36	3.624	9.934	3	0.006835
	TIGIT	0.8145	pass				CD4 TIGIT	No	0.267997	6.975	4.87	2.105	1.552	1.357	3	0.211047
							FDR (Q) = 5%
	Shapiro-Wilk (P value)			Bartlett's test (P value)			Multiple Wilcoxin tests (EphA2 vs. B7-H3)	Discovery?	P value	Sum of pos. ranks	Sum of neg. ranks	Sum of signed ranks (W)	q value
CD8	PD-1	0.0037	fail	NA		NA	CD8 PD1	No	0.25	1	-9	-8	0.525
	LAG3	0.2968	pass				CD8 LAG3	No	0.625	3	-7	-4	0.875
	TIM3	0.2984	pass				CD8 TIM3	No	0.125	0	-10	-10	0.525
	TIGIT	0.2799	pass				CD8 TIGIT	No	0.875	6	-4	2	0.91875
							FDR (Q) = 5%
Fig. 3G	Shapiro-Wilk (P value)			Bartlett's test (P value)			Multiple Wilcoxin tests (EphA2 vs. B7-H3)	Discovery?	P value	Sum of pos. ranks	Sum of neg. ranks	Sum of signed ranks (W)	q value
CD4	PD-1	0.0478	fail	NA		NA	CD4 PD1	No	>0.999999	5	-5	0	>0.999999
	LAG3	0.2183	pass				CD4 LAG3	No	0.875	4	-6	-2	>0.999999
	TIM3	0.1739	pass				CD4 TIM3	No	0.125	0	-10	-10	0.525
	TIGIT	0.027	fail				CD4 TIGIT	No	0.625	7	-3	4	>0.999999
							FDR (Q) = 5%
							Multiple Wilcoxin tests (EphA2 vs. B7-H3)	Discovery?	P value	Sum of pos. ranks	Sum of neg. ranks	Sum of signed ranks (W)	q value
CD8	PD-1	0.005	fail	NA		NA	CD8 PD1	No	0.625	7	-3	4	0.65625
	LAG3	0.3605	pass				CD8 LAG3	No	0.125	0	-10	-10	0.2625
	TIM3	0.0082	fail				CD8 TIM3	No	0.125	0	-10	-10	0.2625
	TIGIT	0.1392	pass				CD8 TIGIT	No	0.375	8	-2	6	0.525
							FDR (Q) = 5%
Fig. 3H	Shapiro-Wilk (P value)			Bartlett's test (P value)			Multiple Wilcoxin tests (EphA2 vs. B7-H3)	Discovery?	P value	Sum of pos. ranks	Sum of neg. ranks	Sum of signed ranks (W)	q value
CD4	PD-1	0.7278	pass	NA		NA	CD4 PD1	No	0.875	6	-4	2	0.91875
	LAG3	0.0286	fail				CD4 LAG3	No	0.875	6	-4	2	0.91875
	TIM3	0.7479	pass				CD4 TIM3	No	0.625	3	-7	-4	0.91875
	TIGIT	0.1447	pass				CD4 TIGIT	No	0.125	10	0	10	0.525
							FDR (Q) = 5%
							Multiple Wilcoxin tests (EphA2 vs. B7-H3)	Discovery?	P value	Sum of pos. ranks	Sum of neg. ranks	Sum of signed ranks (W)	q value
CD8	PD-1	0.0432	fail	NA		NA	CD8 PD1	No	0.125	10	0	10	0.2625
	LAG3	0.4799	pass				CD8 LAG3	No	0.25	1	-9	-8	0.2625
	TIM3	0.2177	pass				CD8 TIM3	No	0.125	0	-10	-10	0.2625
	TIGIT	0.2339	pass				CD8 TIGIT	No	0.25	9	-1	8	0.2625
							FDR (Q) = 5%

## Sheet: Figure 4
	Test for normality			Test for equal variance			Test to compare mean/median
Fig. 4F	Shapiro-Wilk (P value)			Bartlett's test (P value)			Tukey's multiple comparisons test	Mean diff.	95.00% CI of diff.	Below threshold?	Summary	Adjusted P Value
	EphA2 CAR	0.4298	pass	NA		NA	EphA2
	B7-H3 CAR	0.4747	pass				0 vs. 8.8	5.233	-4.305 to 14.77	No	ns	0.4222
							0 vs. 88	10.67	1.129 to 20.20	Yes	*	0.0258
							0 vs. 880	24.53	15.00 to 34.07	Yes	****	<0.0001
							8.8 vs. 88	5.433	-4.105 to 14.97	No	ns	0.3908
							8.8 vs. 880	19.3	9.762 to 28.84	Yes	***	0.0001
							88 vs. 880	13.87	4.329 to 23.40	Yes	**	0.0037
							B7-H3
							0 vs. 8.8	-5.233	-14.77 to 4.305	No	ns	0.4222
							0 vs. 88	-10.7	-20.24 to -1.162	Yes	*	0.0253
							0 vs. 880	-24.57	-34.10 to -15.03	Yes	****	<0.0001
							8.8 vs. 88	-5.467	-15.00 to 4.071	No	ns	0.3857
							8.8 vs. 880	-19.33	-28.87 to -9.795	Yes	***	0.0001
							88 vs. 880	-13.87	-23.40 to -4.329	Yes	**	0.0037
Fig. 4G	Shapiro-Wilk (P value)			Bartlett's test (P value)			Šídák's multiple comparisons test	Mean diff.	95.00% CI of diff.	Below threshold?	Summary	Adjusted P Value
	EphA2 CAR alone	0.1798	pass	NA		NA	EphA2 CAR
	EphA2CAR + B7-H3 CAR	0.6028	pass				Row 1 vs. Row 2	-5.825	-17.88 to 6.226	No	ns	0.6931
							Row 1 vs. Row 3	-19.05	-31.10 to -6.999	Yes	***	0.0008
							Row 1 vs. Row 4	-30.6	-42.65 to -18.55	Yes	****	<0.0001
							Row 2 vs. Row 3	-13.23	-25.28 to -1.174	Yes	*	0.026
							Row 2 vs. Row 4	-24.78	-36.83 to -12.72	Yes	****	<0.0001
							Row 3 vs. Row 4	-11.55	-23.60 to 0.5012	No	ns	0.0655
							EphA2 + B7-H3 CAR
							Row 1 vs. Row 2	-2.493	-14.54 to 9.559	No	ns	0.9926
							Row 1 vs. Row 3	-9.243	-21.29 to 2.809	No	ns	0.2066
							Row 1 vs. Row 4	-13.82	-25.87 to -1.766	Yes	*	0.0186
							Row 2 vs. Row 3	-6.75	-18.80 to 5.301	No	ns	0.5404
							Row 2 vs. Row 4	-11.33	-23.38 to 0.7262	No	ns	0.0738
							Row 3 vs. Row 4	-4.575	-16.63 to 7.476	No	ns	0.869
Fig. 4H	Shapiro-Wilk (P value)			Bartlett's test (P value)			Tukey's multiple comparisons test	Mean diff.	95.00% CI of diff.	Below threshold?	Summary	Adjusted P Value
	D341 (left)	0.9096	pass	0.5339		pass	B7.Ctrl vs. B7.B7-H3	-21.4	-85.16 to 42.35	No	ns	0.483
							B7.Ctrl vs. EA2.Ctrl	28.19	-8.842 to 65.22	No	ns	0.1002
							B7.Ctrl vs. EA2.B7-H3	23.61	-2.983 to 50.19	No	ns	0.0682
							B7.B7-H3 vs. EA2.Ctrl	49.59	3.552 to 95.63	Yes	*	0.041
							B7.B7-H3 vs. EA2.B7-H3	45.01	-7.384 to 97.40	No	ns	0.0742
							EA2.Ctrl vs. EA2.B7-H3	-4.584	-52.31 to 43.14	No	ns	0.9623
	HDMB03 (middle)	0.8047	pass	0.3179			Tukey's multiple comparisons test	Mean diff.	95.00% CI of diff.	Below threshold?	Summary	Adjusted P Value
							B7.Ctrl vs. B7.B7-H3	-18.23	-57.87 to 21.42	No	ns	0.2956
							B7.Ctrl vs. EA2.Ctrl	23.34	-29.54 to 76.22	No	ns	0.3178
							B7.Ctrl vs. EA2.B7-H3	11.22	-4.632 to 27.07	No	ns	0.1193
							B7.B7-H3 vs. EA2.Ctrl	41.57	-7.506 to 90.65	No	ns	0.0769
							B7.B7-H3 vs. EA2.B7-H3	29.44	3.023 to 55.87	Yes	*	0.0374
							EA2.Ctrl vs. EA2.B7-H3	-12.13	-56.40 to 32.14	No	ns	0.6101
	D425 (right)	0.7191	pass	0.4085		pass	Tukey's multiple comparisons test	Mean diff.	95.00% CI of diff.	Below threshold?	Summary	Adjusted P Value
							B7.Ctrl vs. B7.B7-H3	-10.75	-50.82 to 29.33	No	ns	0.6227
							B7.Ctrl vs. EA2.Ctrl	22.85	-30.68 to 76.37	No	ns	0.3367
							B7.Ctrl vs. EA2.B7-H3	20.2	2.994 to 37.41	Yes	*	0.0325
							B7.B7-H3 vs. EA2.Ctrl	33.6	-7.610 to 74.80	No	ns	0.0846
							B7.B7-H3 vs. EA2.B7-H3	30.95	4.143 to 57.76	Yes	*	0.034
							EA2.Ctrl vs. EA2.B7-H3	-2.647	-40.74 to 35.45	No	ns	0.9847
Fig. 4I	Shapiro-Wilk (P value)			Bartlett's test (P value)			Tukey's multiple comparisons test	Mean diff.	95.00% CI of diff.	Below threshold?	Summary	Adjusted P Value
	%CD4+	0.1733	pass	0.9942		pass	B7.Ctrl vs. B7.B7-H3	-1.343	-33.08 to 30.39	No	ns	0.9964
							B7.Ctrl vs. EA2.Ctrl	-14.98	-33.49 to 3.541	No	ns	0.0863
							B7.Ctrl vs. EA2.B7-H3	-22.55	-72.43 to 27.33	No	ns	0.3047
							B7.B7-H3 vs. EA2.Ctrl	-13.63	-27.37 to 0.1038	No	ns	0.051
							B7.B7-H3 vs. EA2.B7-H3	-21.21	-39.52 to -2.898	Yes	*	0.0337
							EA2.Ctrl vs. EA2.B7-H3	-7.575	-39.38 to 24.23	No	ns	0.6908
Fig. 4J	Shapiro-Wilk (P value)			Bartlett's test (P value)			Dunn's multiple comparisons test	Rank sum diff.	Significant?	Summary	Adjusted P Value
	IFNg (pg/mL)	0.005	fail	0.0004		fail	B7.Ctrl vs. B7.B7-H3	1	No	ns	>0.9999
							B7.Ctrl vs. EA2.Ctrl	-6.5	No	ns	0.4504
							B7.Ctrl vs. EA2.B7-H3	-8.5	No	ns	0.1195
							B7.B7-H3 vs. EA2.Ctrl	-7.5	No	ns	0.2399
							B7.B7-H3 vs. EA2.B7-H3	-9.5	No	ns	0.0557
							EA2.Ctrl vs. EA2.B7-H3	-2	No	ns	>0.9999
Fig. 4K	Shapiro-Wilk (P value)			Bartlett's test (P value)			Dunn's multiple comparisons test	Rank sum diff.	Significant?	Summary	Adjusted P Value
	IL-2 (pg/mL)	0.0061	fail	0.0479		fail	B7.Ctrl vs. B7.B7-H3	0	No	ns	>0.9999
							B7.Ctrl vs. EA2.Ctrl	-7	No	ns	0.3314
							B7.Ctrl vs. EA2.B7-H3	-9	No	ns	0.0823
							B7.B7-H3 vs. EA2.Ctrl	-7	No	ns	0.3314
							B7.B7-H3 vs. EA2.B7-H3	-9	No	ns	0.0823
							EA2.Ctrl vs. EA2.B7-H3	-2	No	ns	>0.9999
Fig. 4L	Shapiro-Wilk (P value)			Bartlett's test (P value)			Tukey's multiple comparisons test	Mean diff.	95.00% CI of diff.	Below threshold?	Summary	Adjusted P Value
	GZMB (pg/mL)	0.1685	pass	0.2993		pass	B7.Ctrl vs. B7.B7-H3	457.5	-6620 to 7535	No	ns	0.9969
							B7.Ctrl vs. EA2.Ctrl	-5342	-12419 to 1736	No	ns	0.156
							B7.Ctrl vs. EA2.B7-H3	-7578	-14656 to -500.3	Yes	*	0.0359
							B7.B7-H3 vs. EA2.Ctrl	-5799	-12877 to 1278	No	ns	0.1162
							B7.B7-H3 vs. EA2.B7-H3	-8036	-15113 to -957.8	Yes	*	0.0265
							EA2.Ctrl vs. EA2.B7-H3	-2236	-9314 to 4841	No	ns	0.7606

## Sheet: Figure 5
Fig. 5D		Median survival (days)			Logrank (Mantel-Cox) p value	Below Threshold?
	Tumor only	20		Tumor only vs EphA2	<0.0001	Yes	****
	EphA2-CAR	39		Tumor Only vs. B7-H3	0.0007	Yes	***
	B7-H3-CAR	27		EphA2 vs. B7-H3	<0.0001	Yes	****
Fig. 5H		Median survival (days)			Logrank (Mantel-Cox) p value
	Tumor only	29		Tumor only vs EphA2	<0.0001	Yes	****
	EphA2-CAR	Undefined		Tumor Only vs. B7-H3	<0.0001	Yes	****
	B7-H3-CAR	55		EphA2 vs. B7-H3	0.0008	Yes	***
Fig. 5L		Median survival (days)			Logrank (Mantel-Cox) p value
	Tumor only	20		Tumor only vs EphA2	0.0005	Yes	***
	EphA2-CAR	39		Tumor Only vs. B7-H3	0.0002	Yes	***
	B7-H3-CAR	27		EphA2 vs. B7-H3	0.0919	No

## Sheet: Figure 6
Fig. 6C		Median survival (days)			Logrank (Mantel-Cox) p value	Below Threshold?
	Tumor only	16		Tumor only vs EA2.Std	<0.0001	Yes	****
	EA2.Std	41		Tumor Only vs. EA2.MyD88	0.3623	No	ns
	EA2.MyD88	13		EA2.Std vs EA2.MyD88	<0.0001	Yes	****
Fig. 6F		Median survival (days)			Logrank (Mantel-Cox) p value
	Tumor only	16		Tumor only vs EA2.Std	<0.0001	Yes	****
	EA2.Std	41		Tumor Only vs. EA2.D3A	<0.0001	Yes	****
	EA2.D3A	58		EA2.Std vs EA2.D3A	0.0002	Yes	***
Fig. 6I		Median survival (days)			Logrank (Mantel-Cox) p value
	Tumor only	16		Tumor only vs EA2.Std	<0.0001	Yes	****
	EA2.Std	41		Tumor Only vs. EA2.Zip2R	<0.0001	Yes	****
	EA2.Zip2R	45		EA2.Std vs EA2.Zip2R	0.0302	Yes	*
Fig. 6L		Median survival (days)			Logrank (Mantel-Cox) p value
	Tumor only	16		Tumor only vs EA2.Std	<0.0001	Yes	****
	EA2.Std	41		Tumor Only vs. EA2.Zip18R	<0.0001	Yes	****
	EA2.Zip18R	62		EA2.Std vs EA2.Zip18R	<0.0001	Yes	****

## Sheet: Ext. Data Figure 1
	Test for normality			Test for equal variance			Test to compare mean/median
Fig. 1A	Shapiro-Wilk (P value)				Bartlett's test		Dunn's multiple comparisons test	Mean rank diff.	Significant?	Summary	Adjusted P Value
	EphA2 expression	<0.0001	fail	<0.0001		fail	WNT vs. SHH	121	Yes	****	<0.0001
							WNT vs. G3	-323	Yes	****	<0.0001
							WNT vs. G4	23.73	No	ns	>0.9999
							SHH vs. G3	-443.9	Yes	****	<0.0001
							SHH vs. G4	-97.26	Yes	***	0.0005
							G3 vs. G4	346.7	Yes	****	<0.0001
Fig. 1B	Shapiro-Wilk (P value)				Bartlett's test		Dunnett's T3 multiple comparisons test	Mean diff.	95.00% CI of diff.	Below threshold?	Summary	Adjusted P Value
	B7-H3 expression	0.8273	pass	<0.0001		fail	WNT vs. SHH	0.523	0.3910 to 0.6550	Yes	****	<0.0001
							WNT vs. G3	0.4501	0.3098 to 0.5904	Yes	****	<0.0001
							WNT vs. G4	0.1632	0.04497 to 0.2814	Yes	**	0.0021
							SHH vs. G3	-0.07289	-0.1892 to 0.04337	No	ns	0.4596
							SHH vs. G4	-0.3598	-0.4472 to -0.2724	Yes	****	<0.0001
							G3 vs. G4	-0.2869	-0.3869 to -0.1869	Yes	****	<0.0001
Fig. 1C	Shapiro-Wilk (P value)				Bartlett's test		Dunn's multiple comparisons test	Mean rank diff.	Significant?	Summary	Adjusted P Value
	EphA2 drivier activity	<0.0001	fail	<0.0001		fail	WNT vs. SHH	448.4	Yes	****	<0.0001
							WNT vs. G3	-0.9383	No	ns	>0.9999
							WNT vs. G4	318.5	Yes	****	<0.0001
							SHH vs. G3	-449.3	Yes	****	<0.0001
							SHH vs. G4	-129.9	Yes	****	<0.0001
							G3 vs. G4	319.5	Yes	****	<0.0001
Fig. 1D	Shapiro-Wilk (P value)				Bartlett's test		Dunnett's T3 multiple comparisons test	Mean diff.	95.00% CI of diff.	Below threshold?	Summary	Adjusted P Value
	B7-H3 drivier activity	0.4597	pass	0.0051		fail	WNT vs. SHH	0.05665	0.04668 to 0.06662	Yes	****	<0.0001
							WNT vs. G3	0.07184	0.06075 to 0.08293	Yes	****	<0.0001
							WNT vs. G4	0.0303	0.02093 to 0.03966	Yes	****	<0.0001
							SHH vs. G3	0.01519	0.006480 to 0.02389	Yes	****	<0.0001
							SHH vs. G4	-0.02635	-0.03263 to -0.02008	Yes	****	<0.0001
							G3 vs. G4	-0.04154	-0.04953 to -0.03356	Yes	****	<0.0001
Fig. 1E	Shapiro-Wilk (P value)				Bartlett's test		Tukey's multiple comparisons test	Mean diff.	95.00% CI of diff.	Below threshold?	Summary	Adjusted P Value
	EphA2 expression	0.7186		0.1267		pass	WNT vs. SHH	2.549	1.519 to 3.580	Yes	****	<0.0001
							WNT vs. G3	0.3989	-0.6457 to 1.444	No	ns	0.7547
							WNT vs. G4	2.485	1.501 to 3.470	Yes	****	<0.0001
							SHH vs. G3	-2.15	-2.948 to -1.353	Yes	****	<0.0001
							SHH vs. G4	-0.06395	-0.7804 to 0.6525	No	ns	0.9956
							G3 vs. G4	2.087	1.350 to 2.823	Yes	****	<0.0001
Fig. 1F	Shapiro-Wilk (P value)				Bartlett's test		Dunn's multiple comparisons test	Mean rank diff.	Significant?	Summary	Adjusted P Value
	B7-H3 expression	0.0002	fail	0.115		pass	WNT vs. SHH	28.89	No	ns	0.2055
							WNT vs. G3	41.57	Yes	*	0.0159
							WNT vs. G4	21.09	No	ns	0.6337
							SHH vs. G3	12.68	No	ns	>0.9999
							SHH vs. G4	-7.8	No	ns	>0.9999
							G3 vs. G4	-20.48	No	ns	0.2149
Fig. 1G	Shapiro-Wilk (P value)				Bartlett's test		Dunnett's T3 multiple comparisons test	Mean diff.	95.00% CI of diff.	Below threshold?	Summary	Adjusted P Value
	EphA2 drivier activity	0.6003	pass	<0.0001		fail	WNT vs. SHH	0.225	0.1855 to 0.2646	Yes	****	<0.0001
							WNT vs. G3	-0.004507	-0.05845 to 0.04944	No	ns	>0.9999
							WNT vs. G4	0.1756	0.1305 to 0.2208	Yes	****	<0.0001
							SHH vs. G3	-0.2295	-0.2706 to -0.1885	Yes	****	<0.0001
							SHH vs. G4	-0.0494	-0.07604 to -0.02277	Yes	****	<0.0001
							G3 vs. G4	0.1801	0.1331 to 0.2272	Yes	****	<0.0001
Fig. 1H	Shapiro-Wilk (P value)				Bartlett's test		Dunn's multiple comparisons test	Mean rank diff.	Significant?	Summary	Adjusted P Value
	B7-H3 drivier activity	0.0079	fail	0.784		pass	WNT vs. SHH	39.33	Yes	*	0.0237
							WNT vs. G3	60.08	Yes	****	<0.0001
							WNT vs. G4	24.43	No	ns	0.3652
							SHH vs. G3	20.75	No	ns	0.2973
							SHH vs. G4	-14.9	No	ns	0.6975
							G3 vs. G4	-35.65	Yes	**	0.0016

## Sheet: Ext. Data Figure 3
	Test for normality			Test for equal variance			Test to compare mean/median	Below Threshold?
	Shapiro-Wilk (P value)			Bartlett's test (P value)			Paired T test P value (EphA2 vs. B7-H3)
Fig. S3A	IFNg	0.4199	pass	NA			0.075	No
Fig. S3B	IL-2	0.1922	pass	NA			0.0823	No
Fig. S3C	TNFa	0.1484	pass	NA			0.0611	No
Fig. S3D	TNFB	0.2853	pass	NA			0.157	No
Fig. S3E	GM-CSF	0.3099	pass	NA			0.0721	No
Fig. S3F	TH1 additive	0.4148	pass	NA			0.049	Yes
Fig. S3G	IL-4	0.159	pass	NA			0.0823	No
Fig. S3H	IL-5	0.1923	pass	NA			0.9916	No
Fig. S3J	IL-9	0.5992	pass	NA			0.9245	No
Fig . S3K	IL-10	0.2301	pass	NA			0.1421	No
Fig. S3M	IL-17A	0.092	pass	NA			0.086	No
Fig. S3N	IL-6	0.1033	pass	NA			0.1431	No
Fig. S3O	TH17 additive	0.0577	pass	NA			0.0873	No
Fig . S3Q	IL-7	0.1004	pass	NA			0.5588	No
							Wilcoxin matched-pairs signed rank test (EphA2 vs. B7-H3)
Fig. S3I	IL-13	0.0051	fail	NA			0.5	No
Fig. S3L	TH2 additive	0.0134	fail	NA			0.25	No
Fig. S3P	IL-3	0.034	fail	NA			0.25	No
Fig. S3R	G-CSF	0.0082	fail	NA			0.5	No
Fig. S3S	Other additive	0.0389	fail	NA			0.25	No

## Sheet: Ext. Data Figure 6
	Test for normality			Test for equal variance			Test to compare mean/median
	Shapiro-Wilk (P value)			Bartlett's test (P value)			Tukey's multiple comparison test. With Gessier-Greenhouse correction	Mean diff.	95.00% CI of diff.	Below threshold?	Summary	Adjusted P Value
Fig. S6B	TDX	0.0605	pass	0.0109		fail	B7.Ctrl vs. B7.B7-H3	-2.6	-18.03 to 12.83	No	ns	0.8461
							B7.Ctrl vs. EA2.Ctrl	14.18	3.523 to 24.83	Yes	*	0.023
							B7.Ctrl vs. EA2.B7-H3	7.025	-9.635 to 23.69	No	ns	0.3437
							B7.B7-H3 vs. EA2.Ctrl	16.78	-6.146 to 39.70	No	ns	0.1102
							B7.B7-H3 vs. EA2.B7-H3	9.625	-6.278 to 25.53	No	ns	0.1704
							EA2.Ctrl vs. EA2.B7-H3	-7.15	-27.42 to 13.12	No	ns	0.452
	Shapiro-Wilk (P value)			Brown-Forsyth test (P value)			Tukey's multiple comparisons test. Mixed-effects model for missing data	Predicted (LS) Mean diff.	95.00% CI of diff.	Below threshold?	Summary	Adjusted P Value
Fig. S6C	%B7-H3 expressing	0.0848	pass	0.1112		pass	B7.AAVS vs. B7.B7H3 KO	6.445	1.894 to 11.00	Yes	**	0.0083
							B7.AAVS vs. EA2.AAVS	1.74	-2.811 to 6.290	No	ns	0.63
							B7.AAVS vs. EA2.B7H3 KO	8.134	3.584 to 12.68	Yes	**	0.002
							B7.B7H3 KO vs. EA2.AAVS	-4.705	-8.878 to -0.5316	Yes	*	0.0283
							B7.B7H3 KO vs. EA2.B7H3 KO	1.689	-2.484 to 5.863	No	ns	0.5898
							EA2.AAVS vs. EA2.B7H3 KO	6.394	2.221 to 10.57	Yes	**	0.0052
